# Supplementary material for: In silico and in vivo discovery of antioxidant sea cucumber peptides with antineurodegenerative properties
Source: Royal Society of Chemistry journal article supplement (doi:10.1039/d4fo01542h), 2024-01-01
Supplement: d4fo01542h1.pdf [file d4fo01542h1.pdf]

*Supplementary information for*

***In silico* and *in vivo* discovery of antioxidant sea cucumber peptides with antineurodegenerative properties**

Qiangqiang Wang,<sup>a</sup> Ming Liang,<sup>a,b</sup> Yue Xiao,<sup>a</sup> Zhenhua Li,<sup>c</sup> Xiaohe Chen,<sup>d</sup> Peng Cheng,<sup>c</sup> Bing Qi,<sup>c</sup> Yi Yu,<sup>b</sup> Tao Lei\*<sup>d</sup> and Zebo Huang\*<sup>a,c</sup>

<sup>a</sup> *Institute for Food Nutrition and Human Health, School of Food Science and Engineering, South China University of Technology, Guangzhou 510641, China. E-mail: huangzebo@scut.edu.cn (Z. Huang)*

<sup>b</sup> *Research and Development Center, Infinitus (China) Company Ltd, Guangzhou 510405, China*

<sup>c</sup> *School of Biosciences and Biopharmaceutics, Guangdong Pharmaceutical University, Guangzhou 510006, China*

<sup>d</sup> *Rehabilitation Department, Wuhan Children's Hospital, Wuhan Maternal and Child Healthcare Center, Tongji Medical College, Huazhong University of Science & Technology, Wuhan 430016, China. E-mail: rehabtaolei@163.com (T. Lei)*

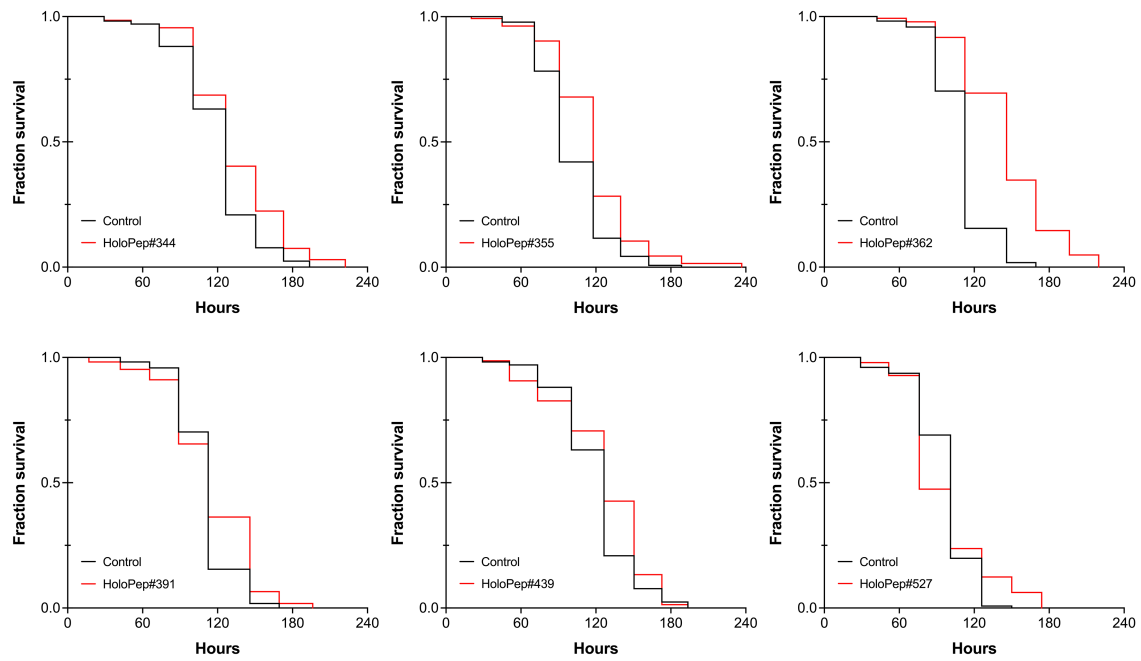

**Supplementary Fig. S1.** Effect of selected sea cucumber peptides on *C. elegans* survival under increased oxidative stress. Shown is a graphical presentation of survival data for paraquat-exposed nematodes treated with selected sea cucumber peptides. After pretreatment with 2.0 mM of the peptides, wild-type nematodes were exposed to 50 mM paraquat for survival assay as in Fig. 3C. Representative results are shown as Kaplan–Meier survival curves.

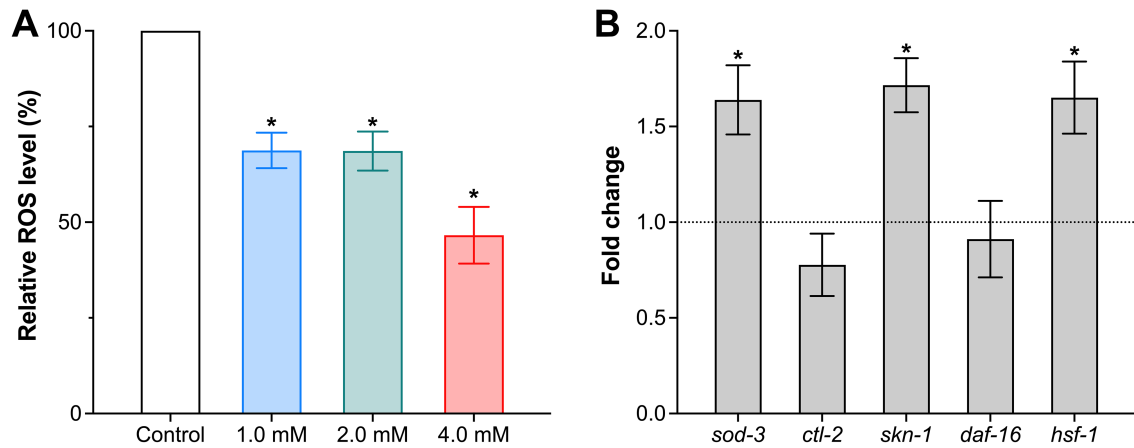

**Supplementary Fig. S2.** Effect of sea cucumber peptide HoloPep#362 on ROS level and gene expression of *C. elegans* under increased oxidative stress. (A) Relative ROS level of paraquat-exposed *C. elegans*. Wild-type nematodes were pretreated with the indicated concentrations of HoloPep#362 and then exposed to 2 mM paraquat for DCF fluorescence determination as in Fig. 3D. Data are mean  $\pm$  SEM of relative DCF fluorescence intensity after 120 min reaction. (B) Gene expression level of paraquat-exposed *C. elegans*. Wild-type nematodes were treated as in (A) using 2.0 mM HoloPep#362. Stress-related genes were analyzed by quantitative real-time PCR. Data are presented as mean  $\pm$  SEM from three independent experiments. \*  $p < 0.05$  versus nematodes exposed to paraquat alone.

## Supplementary Table S1

List of primers used for quantitative real-time PCR analysis.

| Gene          | Forward primer (5'→3') | Reverse primer (5'→3') | Reference |
|---------------|------------------------|------------------------|-----------|
| <i>sod-3</i>  | AGCATCATGCCACCTACGTGA  | CACCACCATTGAATTCAGCG   | [1]       |
| <i>ctl-2</i>  | CTGGGAGAAGGTGTTGGAT    | GGATGAACCTTTGAAAAGTGAT | [2]       |
| <i>skn-1</i>  | AGTGTCGGCGTTCCAGATTC   | GTCGACGAATCTTGCGAATCA  | [1]       |
| <i>daf-16</i> | GCGGAGCCAAGAAGAGGATA   | GGAGAAACACGAGACGACGAT  | [3]       |
| <i>hsf-1</i>  | TCAGCCGCAACAAGACTA     | AGGTGGAAGTCGTTGGAT     | [4]       |
| <i>cdc-42</i> | CTGCTGGACAGGAAGATTACG  | CTCGGACATTCTCGAATGAAG  | [5]       |

References Supplementary Table S1:

- [1] L. Zhang, G. Jie, J. Zhang and B. Zhao, Significant longevity-extending effects of EGCG on *Caenorhabditis elegans* under stress, *Free Radic. Biol. Med.*, 2009, **46**, 414–421.
- [2] T. Sugawara, D. Saraprug and K. Sakamoto, Soy sauce increased the oxidative stress tolerance of nematode via p38 MAPK pathway, *Biosci. Biotechnol. Biochem.*, 2019, **83**, 709–716.
- [3] Y. Luan, Y. Jiang, R. Huang, X. Wang, X. He, Y. Liu and P. Tan, Polygonati Rhizoma polysaccharide prolongs lifespan and healthspan in *Caenorhabditis elegans*, *Molecules*, 2023, **28**, 2235.
- [4] X. Cui, B. Zhang, Z. Li, C. Li and J. Li, Zhuyeqing liquor promotes longevity through enhancing stress resistance via regulation of SKN-1 and HSF-1 transcription factors in *Caenorhabditis elegans*, *Exp. Gerontol.*, 2023, **174**, 112131.
- [5] S. Weimer, J. Prieb, D. Kuhlow, M. Groth, S. Priebe, J. Mansfeld, T. L. Merry, S. Dubuis, B. Laube, A. F. Pfeiffer, T. J. Schulz, R. Guthke, M. Platzner, N. Zamboni, K. Zarse and M. Ristow, D-Glucosamine supplementation extends life span of nematodes and of ageing mice, *Nat. Commun.*, 2014, **5**, 3563.

## Supplementary Table S2

*In vivo* antioxidant capacity and *in silico* BBB permeability and toxicity information of selected sea cucumber peptides.

| Peptide ID <sup>a</sup> | Sequence    | Number of amino acids | MW (Da) | $\Delta$ AUC% <sup>b</sup> | BBB <sup>c</sup> |             | Toxicity <sup>d</sup> |
|-------------------------|-------------|-----------------------|---------|----------------------------|------------------|-------------|-----------------------|
|                         |             |                       |         |                            | Permeability     | Probability |                       |
| HoloPep#344             | AGLQFPVGR   | 9                     | 944.10  | 12.6%                      | +                | 0.92        | Non-toxin             |
| HoloPep#355             | EAIKPSTF    | 9                     | 1005.18 | 17.4%                      | -                | 0.70        | Non-toxin             |
| HoloPep#362             | FETLMPLWGNK | 11                    | 1335.58 | 36.6%                      | +                | 0.70        | Non-toxin             |
| HoloPep#391             | LLQPIMM     | 7                     | 845.13  | 4.7%                       | +                | 0.62        | Non-toxin             |
| HoloPep#439             | WNKFGQDTK   | 9                     | 1123.23 | 5.5%                       | -                | 0.79        | Non-toxin             |
| HoloPep#527             | PPPMLR      | 6                     | 709.90  | 0.3%                       | +                | 0.60        | Non-toxin             |

<sup>a</sup> Selected peptides as in Supplementary Fig. S1.

<sup>b</sup> Relative total survival gain ( $\Delta$ AUC%), which is the change in the area under the survival curve of nematodes between treatments and control.

<sup>c</sup> The blood-brain barrier (BBB) permeability of peptides was analyzed using the ADME@NCATS program (<https://opendata.ncats.nih.gov/adme/predictions>). The symbols “+” and “-” indicate moderate-to-high and low permeabilities, respectively. The prediction also provides a corresponding probability score between 0 and 1.

<sup>d</sup> Potential toxicity of peptides was predicted using the ToxinPred online tool (<https://webs.iiitd.edu.in/raghava/toxinpred/>).

**Supplementary Table S3**

Differentially expressed proteins between HoloPep#362-treated and control polyglutamine *C. elegans* AM141.

| UniProt ID | Protein name                                  | Gene symbol           | Treated vs untreated |                                  |
|------------|-----------------------------------------------|-----------------------|----------------------|----------------------------------|
|            |                                               |                       | <i>p</i> -value      | log <sub>2</sub> FC <sup>a</sup> |
| Q86NE0     | Peptidase A1 domain-containing protein        | <i>asp-2</i>          | 5.76e-06             | 2.30                             |
| G5EEI4     | Aspartic protease 1                           | <i>asp-1</i>          | 6.98e-08             | 2.29                             |
| O01530     | Aspartic protease 6                           | <i>asp-6</i>          | 1.59e-06             | 1.81                             |
| G3MU38     | MIF-like protein mif-2                        | <i>mif-2</i>          | 4.32e-07             | 1.53                             |
| O01532     | Peptidase A1 domain-containing protein        | <i>asp-5</i>          | 3.65e-06             | 1.53                             |
| Q9N5S7     | ThioredoXin domain containing protein homolog | <i>txdc-12.2</i>      | 1.53e-06             | 1.46                             |
| Q20950     | Pept_C1 domain-containing protein             | <i>cpr-9</i>          | 3.60e-05             | 1.39                             |
| P34340     | Putative cuticle collagen 90                  | <i>col-90</i>         | 1.17e-05             | 1.33                             |
| H2KZG6     | Acyl CoA DeHydrogenase                        | <i>acd-1</i>          | 1.36e-06             | 1.33                             |
| Q09975     | Lysozyme                                      | <i>lys-8</i>          | 6.91e-04             | 1.33                             |
| P34528     | Putative serine protease K12H4.7              | <i>K12H4.7</i>        | 3.91e-05             | 1.30                             |
| Q23447     | Uncharacterized protein                       | <i>CELE_ZK180.6</i>   | 3.28e-06             | 1.27                             |
| Q9XW83     | Ground-like domain-containing protein         | <i>grl-15</i>         | 2.11e-06             | 1.27                             |
| H8W3Y1     | NOmpA Homolog                                 | <i>noah-1</i>         | 4.12e-05             | 1.23                             |
| Q9N3V3     | Ground-like domain-containing protein         | <i>grl-5</i>          | 3.62e-05             | 1.23                             |
| Q22972     | Peptidase A1 domain-containing protein        | <i>asp-13</i>         | 9.59e-06             | 1.16                             |
| Q20603     | SCP domain-containing protein                 | <i>scl-2</i>          | 1.55e-04             | 1.08                             |
| P55956     | Aspartic protease 3                           | <i>asp-3</i>          | 1.73e-05             | 1.05                             |
| Q10008     | Uncharacterized protein T19C3.2               | <i>T19C3.2</i>        | 3.10e-05             | 1.05                             |
| O62415     | Lysozyme-like protein 1                       | <i>lys-1</i>          | 3.71e-06             | 1.03                             |
| Q86FL8     | Saposin B-type domain-containing protein      | <i>spp-5</i>          | 2.12e-05             | 1.02                             |
| G5EDV0     | Uncharacterized protein                       | <i>CELE_E01G4.6</i>   | 6.42e-06             | 1.01                             |
| Q067X2     | Uterine Lumin Expressed/locaillized           | <i>ule-2</i>          | 6.15e-06             | -1.01                            |
| P18835     | Cuticle collagen 19                           | <i>col-19</i>         | 8.57e-05             | -1.02                            |
| Q9XWU9     | Uncharacterized protein                       | <i>CELE_Y37D8A.19</i> | 2.03e-04             | -1.04                            |
| Q19813     | Col_cuticle_N domain-containing protein       | <i>col-140</i>        | 3.13e-06             | -1.09                            |
| Q03206     | Ras-related protein ced-10                    | <i>rac-1</i>          | 1.76e-03             | -1.11                            |
| P90889     | Uncharacterized protein                       | <i>CELE_F55H12.4</i>  | 2.17e-05             | -1.14                            |
| O17641     | Col_cuticle_N domain-containing protein       | <i>col-178</i>        | 7.87e-07             | -1.20                            |

|        |                                     |                       |          |       |
|--------|-------------------------------------|-----------------------|----------|-------|
| Q7YTR9 | Uncharacterized protein             | <i>C27B7.9</i>        | 2.29e-06 | -1.22 |
| G5EFS5 | Uncharacterized protein             | <i>CELE_F45D11.15</i> | 3.48e-05 | -1.23 |
| O44145 | PERMeable eggshell                  | <i>perm-2</i>         | 2.33e-04 | -1.32 |
| O17891 | Uncharacterized protein             | <i>CELE_F55B11.2</i>  | 1.68e-06 | -1.36 |
| Q18529 | Uncharacterized protein             | <i>C39D10.7</i>       | 5.88e-05 | -1.38 |
| Q9XWT3 | Uterine Lumin Expressed/localized   | <i>ule-5</i>          | 5.90e-04 | -1.42 |
| O44144 | PERMeable eggshell                  | <i>perm-4</i>         | 4.69e-05 | -1.49 |
| Q9N4J2 | Vitellogenin-3                      | <i>vit-3</i>          | 6.64e-06 | -1.51 |
| P55155 | Vitellogenin-1                      | <i>vit-1</i>          | 3.47e-06 | -1.66 |
| Q18947 | Uterine Lumin Expressed/localized   | <i>ule-3</i>          | 6.04e-08 | -1.70 |
| P06125 | Vitellogenin-5                      | <i>vit-5</i>          | 1.52e-05 | -2.00 |
| Q18943 | Uncharacterized protein             | <i>CELE_D1054.10</i>  | 1.96e-05 | -2.19 |
| O17635 | TransThyretin-Related family domain | <i>ttr-9</i>          | 3.46e-09 | -2.50 |
| P18948 | Vitellogenin-6                      | <i>vit-6</i>          | 1.09e-09 | -3.05 |
| P05690 | Vitellogenin-2                      | <i>vit-2</i>          | 3.22e-08 | -3.69 |

<sup>a</sup> FC, fold change.
